# Supplementary material for: Structural optimization of icaritin for advanced cancer: novel carbamates via oral administration
Source: Royal Society of Chemistry journal article supplement (doi:10.1039/d3nj05723b), 2024-01-01
Supplement: d3nj05723b1.pdf [file d3nj05723b1.pdf]

## Supporting information

### Structural optimization of icaritin for advanced cancer: novel carbamates via oral administration

#### Authors:

Fengxiao Li<sup>1</sup>, Weiping Wang<sup>1</sup>, Jiaqi Fan<sup>1</sup>, Yixiu Zhai<sup>1</sup>, Jiaming Zhang<sup>1</sup>, Tianhong Zhang<sup>1\*</sup>, Qikun Jiang<sup>1,2\*</sup>

#### Affiliation:

<sup>1</sup> Wuya College of Innovation, Shenyang Pharmaceutical University, Shenyang 110016, PR China;

<sup>2</sup> State Key Laboratory of Natural and Biomimetic Drugs, Peking University, Beijing 100871, China.

#### \*Correspondence:

Prof. Tianhong Zhang and Prof. Qikun Jiang

No. 120 Mailbox, School of Pharmacy, Shenyang Pharmaceutical University, 103 Wenhua Road, Shenyang 110016, China.

Tel/Fax: +86-24-23984159; +86-24-23986321

E-mail:

[zhangth1058@aliyun.com](mailto:zhangth1058@aliyun.com)

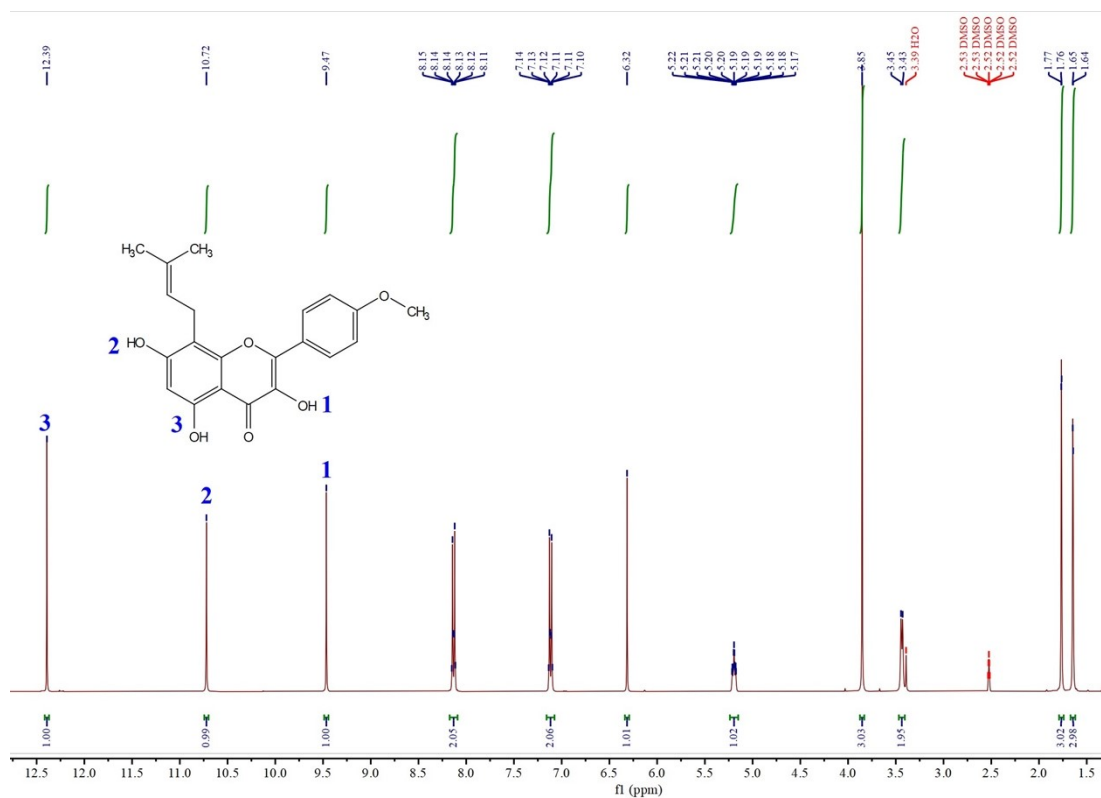

Figure S1.  $^1\text{H-NMR}$  ( $\text{DMSO-}d_6$ ) chart of icaritin.

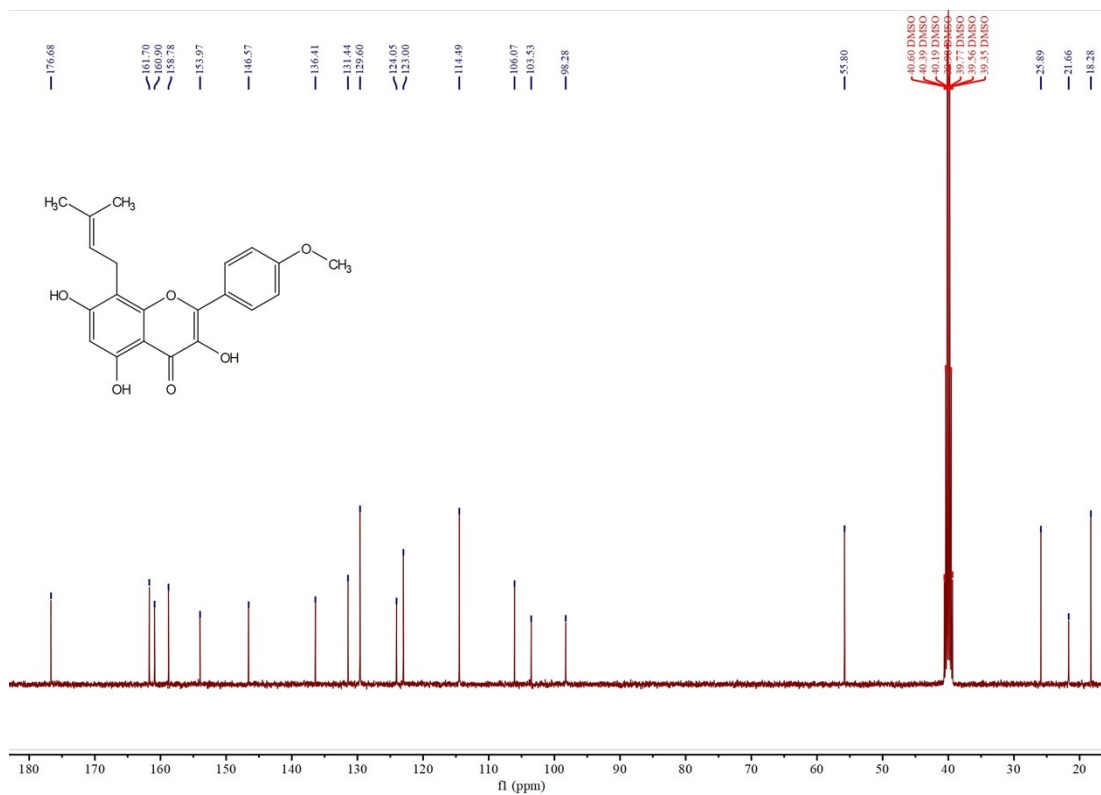

Figure S2.  $^{13}\text{C-NMR}$  ( $\text{DMSO-}d_6$ ) chart of icaritin.

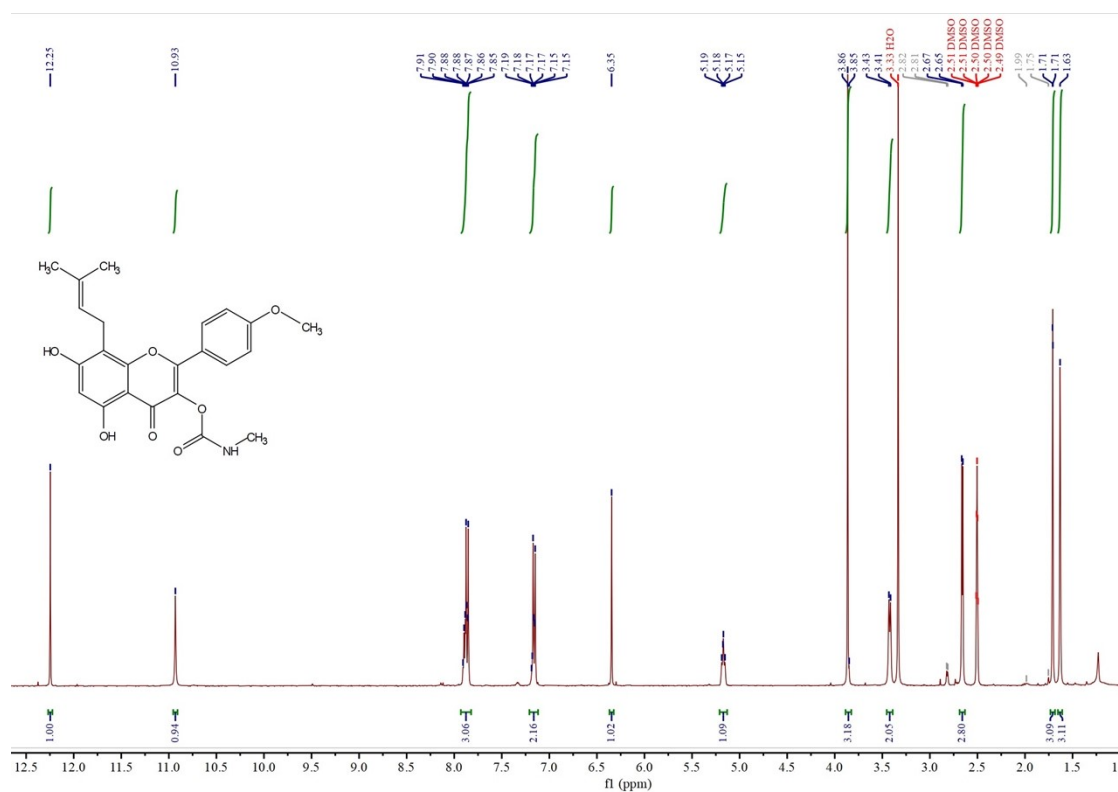

Figure S3. <sup>1</sup>H-NMR (DMSO-*d*<sub>6</sub>) chart of 3N-Me.

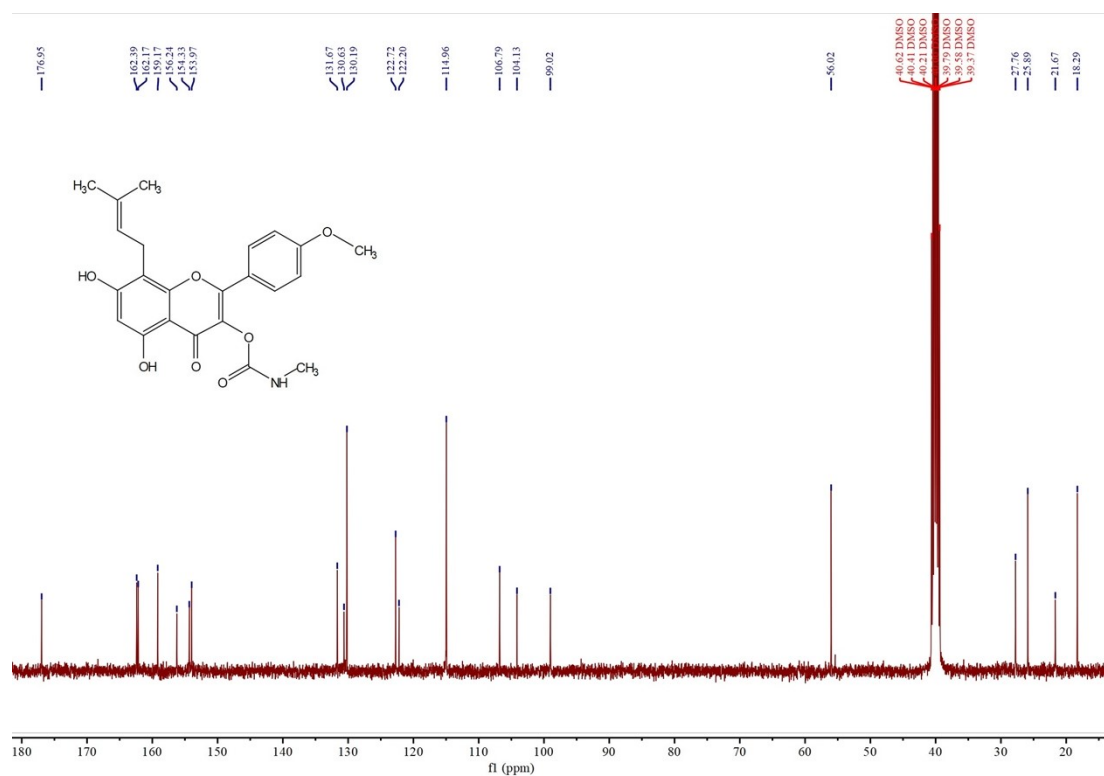

Figure S4. <sup>13</sup>C-NMR (DMSO-*d*<sub>6</sub>) chart of 3N-Me.



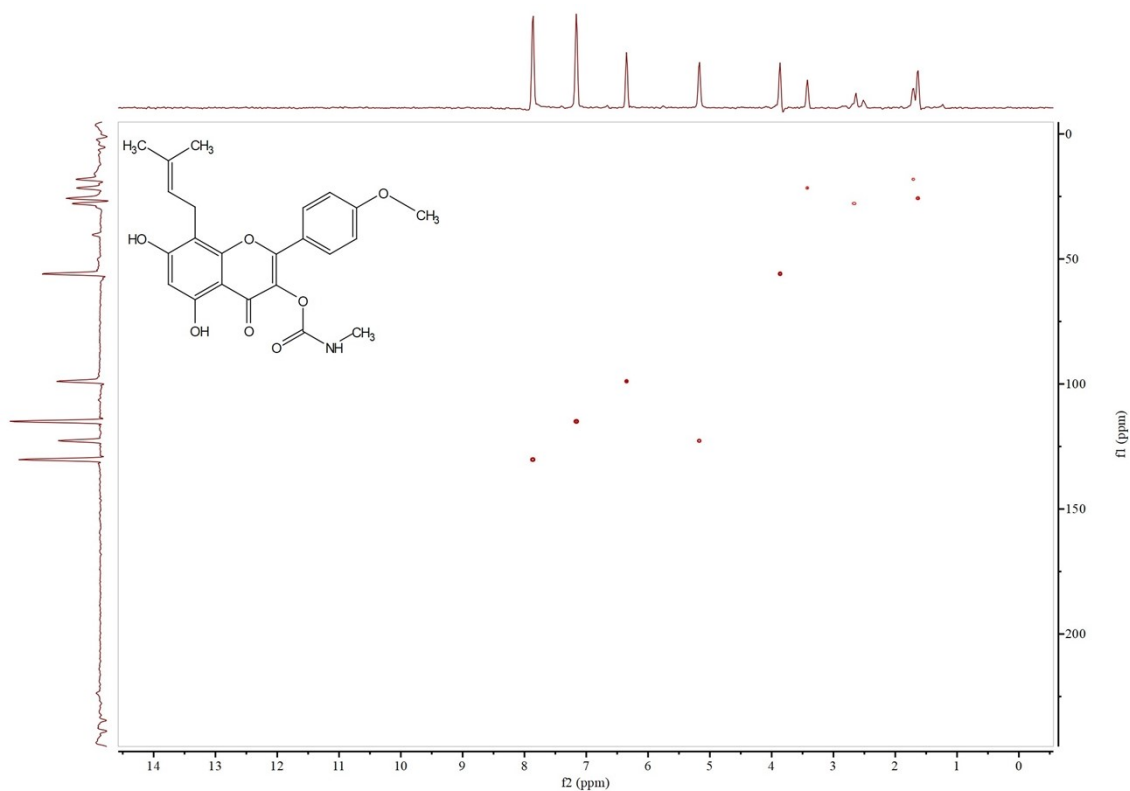

**Figure S7.** HSQC (DMSO- $d_6$ ) chart of 3N-Me.

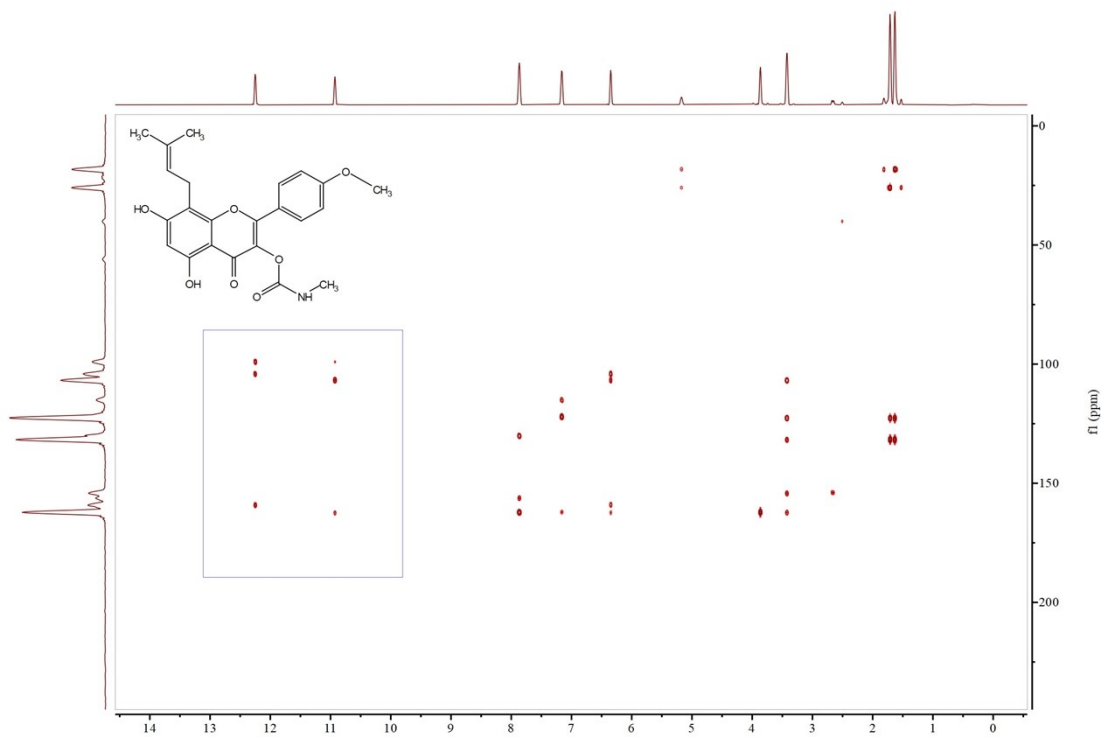

**Figure S8.** HMBC (DMSO- $d_6$ ) chart of 3N-Me.

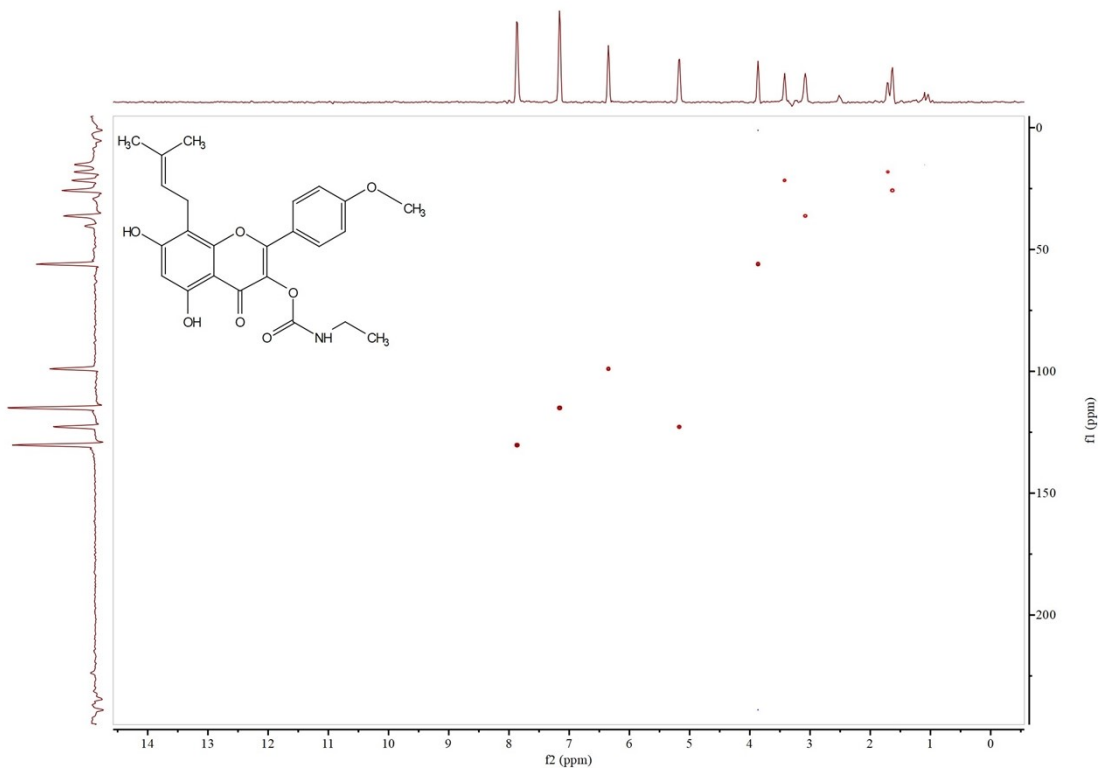

**Figure S9.** HSQC (DMSO- $d_6$ ) chart of 3N-Et.

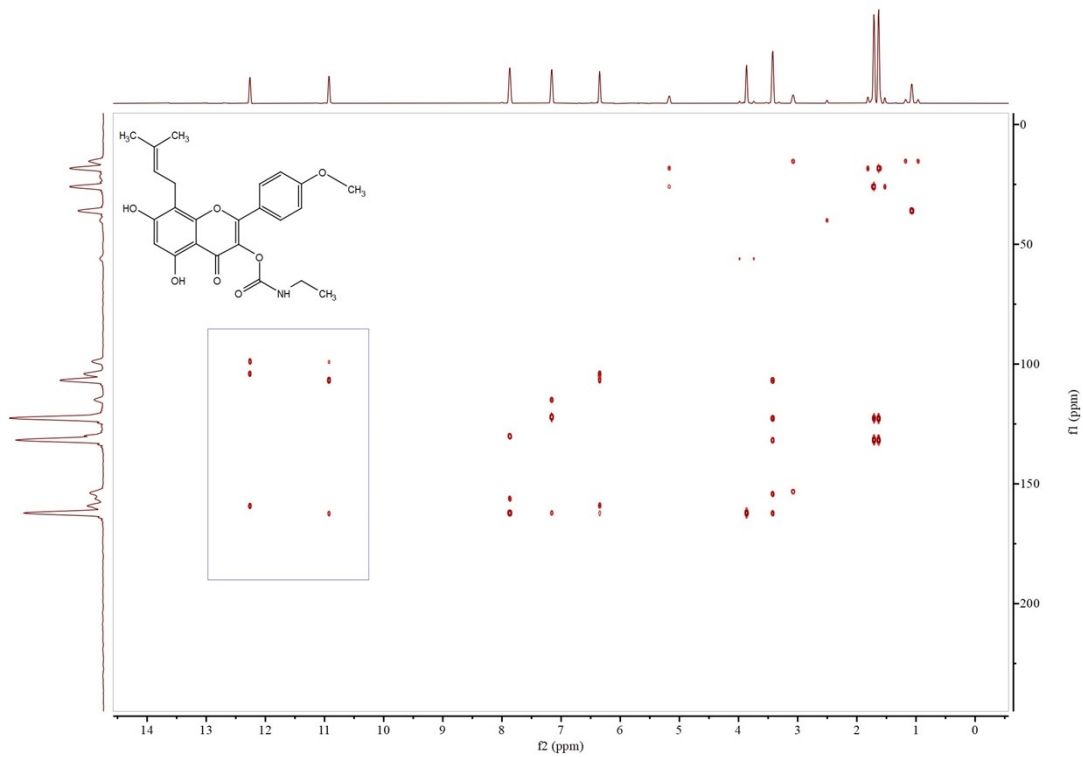

**Figure S10.** HMBC (DMSO- $d_6$ ) chart of 3N-Et.

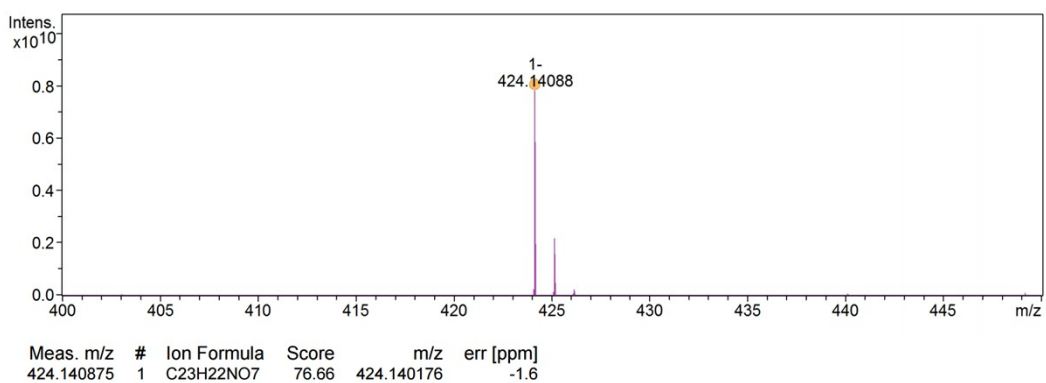

**Figure S11.** HRMS chart of 3N-Me.

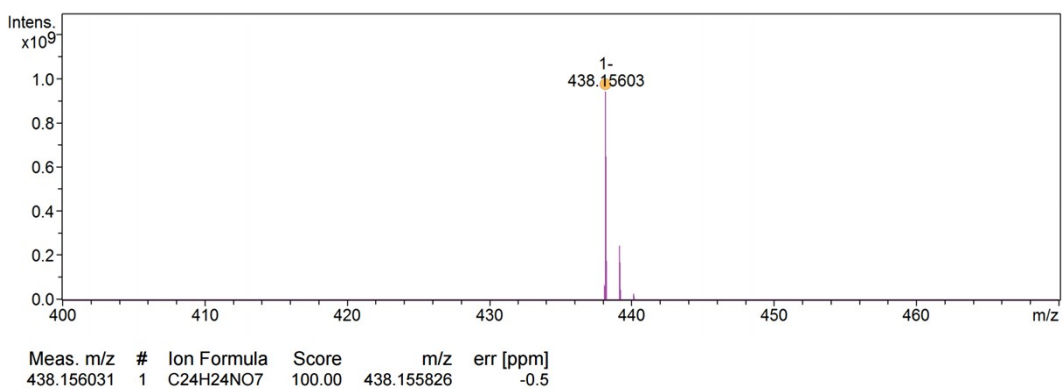

**Figure S12.** HRMS chart of 3N-Et.

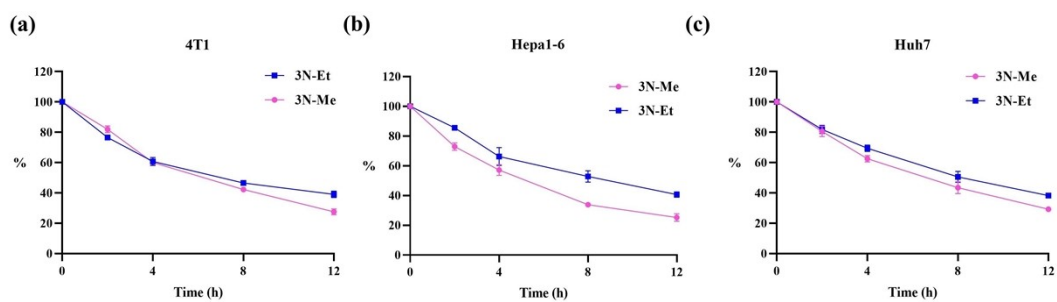

**Figure S13.** The stability of 3N-Me and 3N-Et in tumor cells (n = 3). (a) 4T1 cells; (b) Hepa1-6 cells; (c) Huh7 cells.

**Table S1.** The half-life ( $t_{1/2}$ ) of 3N-Me and 3N-Et in different tumor cells

| $t_{1/2}$ (h) | 4T1  | Hepa1-6 | Huh7 |
|---------------|------|---------|------|
| 3N-Me         | 6.42 | 5.99    | 6.61 |
| 3N-Et         | 9.08 | 9.29    | 8.19 |
